# Supplementary material for: The optical duality of tellurium nanoparticles for broadband solar energy harvesting and efficient photothermal conversion
Source: PubMed Central journal article supplement — Sci Adv. 2018 Aug 10;4(8):eaas9894. doi: 10.1126/sciadv.aas9894 (PMC6086617; doi:10.1126/sciadv.aas9894), 2018-08-10
Supplement: aas9894_SM.pdf [file aas9894_SM.pdf]

## Supplementary Materials for

### **The optical duality of tellurium nanoparticles for broadband solar energy harvesting and efficient photothermal conversion**

Churong Ma, Jiahao Yan, Yingcong Huang, Chengxin Wang, Guowei Yang\*

\*Corresponding author. Email: stsygw@mail.sysu.edu.cn

Published 10 August 2018, *Sci. Adv.* 4, eaas9894 (2018)

DOI: 10.1126/sciadv.aas9894

#### **This PDF file includes:**

- Fig. S1. Typical morphology and structure characterization of Te nanoparticles prepared by ns-LAL.
- Fig. S2. Scattering spectra of individual TeO<sub>2</sub> nanoparticles.
- Fig. S3. Scattering and absorption spectra of Te nanoparticle oligomers.
- Fig. S4. The real part and imaginary part of the refractive index of Te, Au, and Si.
- Fig. S5. The scattering spectra of Au nanoparticles and Si nanoparticles.
- Fig. S6. The electric field enhancements of the Au nanoparticle oligomer.
- Fig. S7. Typical morphology and structure characterization of Te nanoparticles after working in steam generation for about 2 months.
- Fig. S8. Water evaporation using Te nanoparticles that have been working in steam generation for about 2 months.
- Fig. S9. An intuitive diagram illustrating the flow of energy in a photoexcited semiconductor.

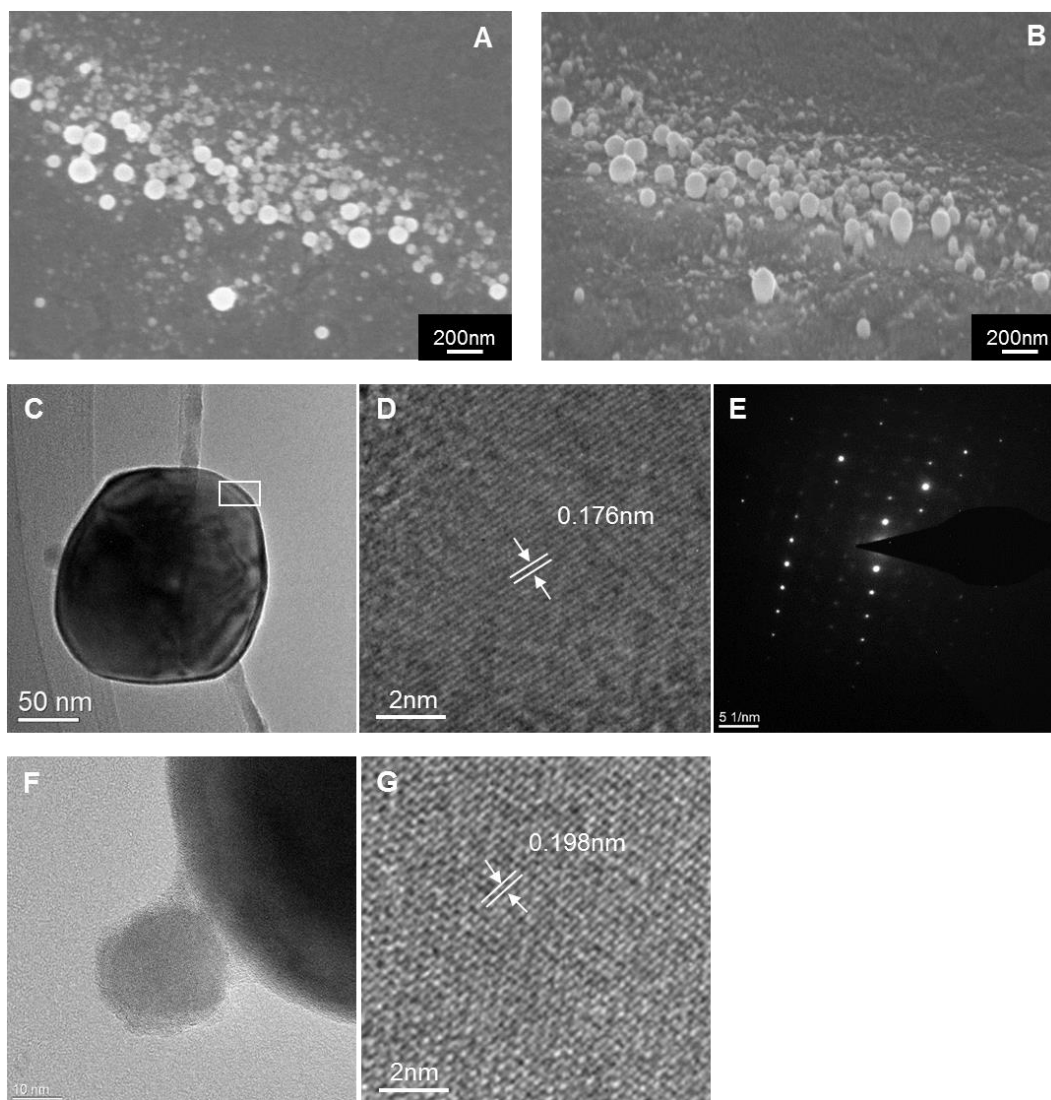

**Fig. S1. Typical morphology and structure characterization of Te nanoparticles prepared by ns-LAL. (A)** The top SEM image of Te nanoparticles. **(B)** The 54°-tilted SEM image. **(C)** TEM image of a Te nanoparticle (about 200 nm) and its corresponding **(D)** HRTEM micrograph and **(E)** SAED pattern. **(F)** TEM image of a Te nanoparticle (about 25 nm) and its corresponding **(G)** HRTEM micrograph.

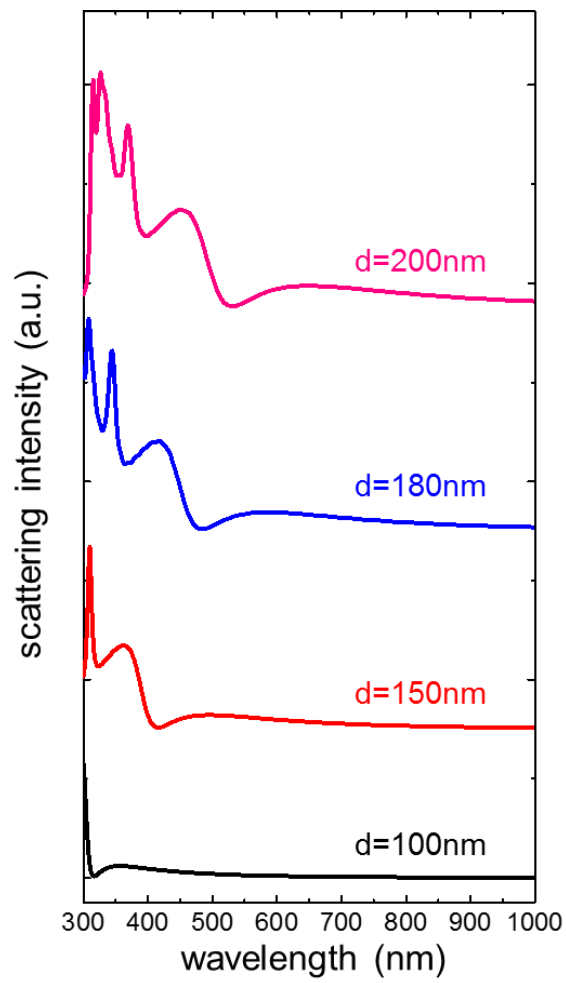

**Fig. S2. Scattering spectra of individual TeO<sub>2</sub> nanoparticles.** (FDTD simulations).

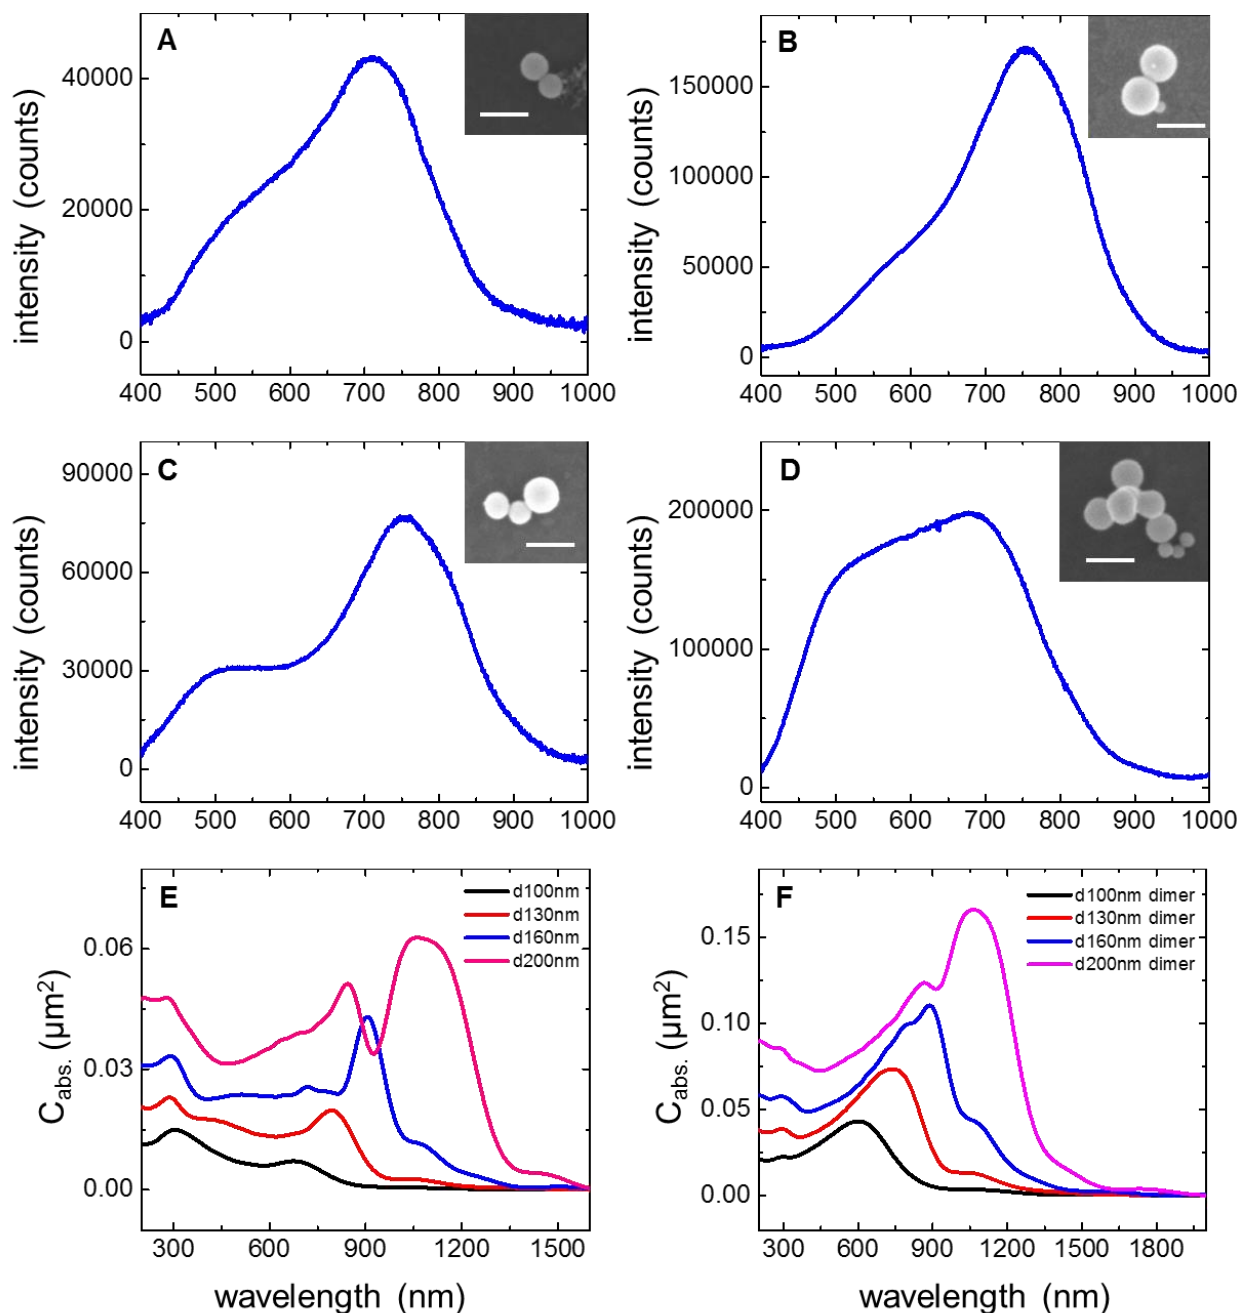

**Fig. S3. Scattering and absorption spectra of Te nanoparticle oligomers.** The measured backward scattering spectra of Te nanoparticle oligomers with diameters of (A) a dimer: 116.6 & 94.7 nm. (B) a dimer: 150.2 & 150.5 nm. (C) a trimer: 151.0 & 91.5 & 100.6 nm. (D) an oligomer. Insets: The corresponding SEM images of Te nanoparticle oligomer. Scale bar: 200 nm. (E) The absorption cross-section of individual Te nanoparticles ranging from 100 to 200 nm. (F) The absorption cross-section of Te nanoparticle dimers ranging from 100 to 200 nm.

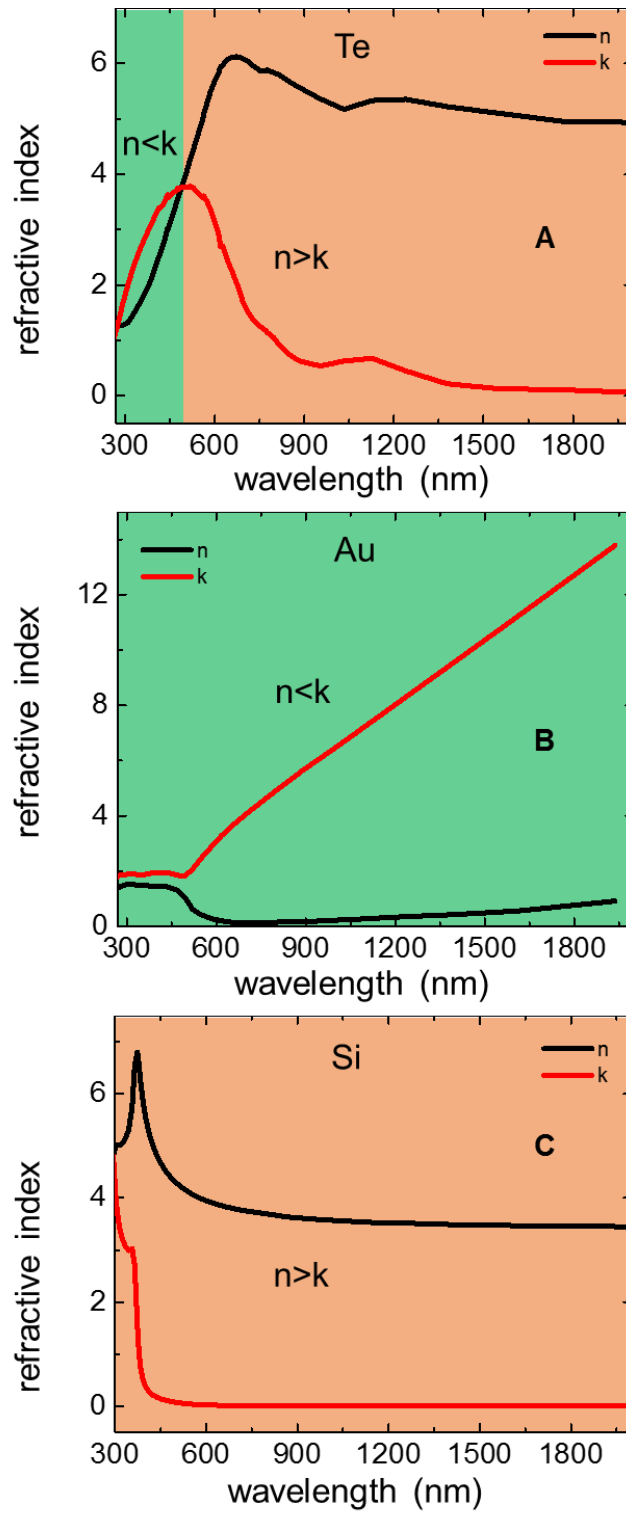

**Fig. S4.** The real part and imaginary part of the refractive index of Te, Au, and Si. The region 'n < k' is painted in green and the region 'n > k' is painted in orange.

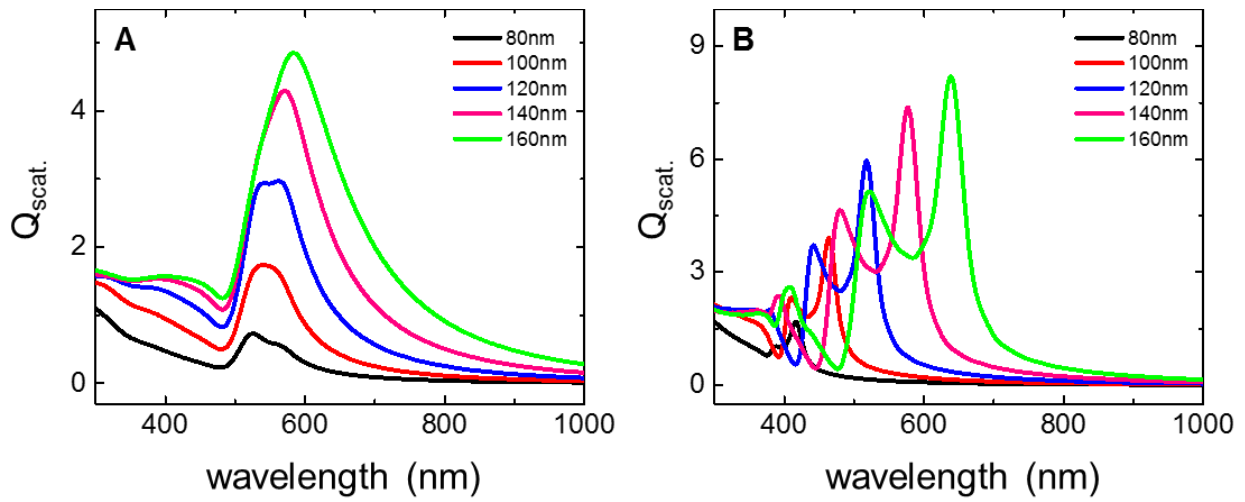

**Fig. S5. The scattering spectra of Au nanoparticles and Si nanoparticles.** The scattering spectra of (A) Au nanoparticles (a plasmonic material) and (B) Si nanoparticles (a high-index all-dielectric material) with diameters ranging from 80 to 160 nm.

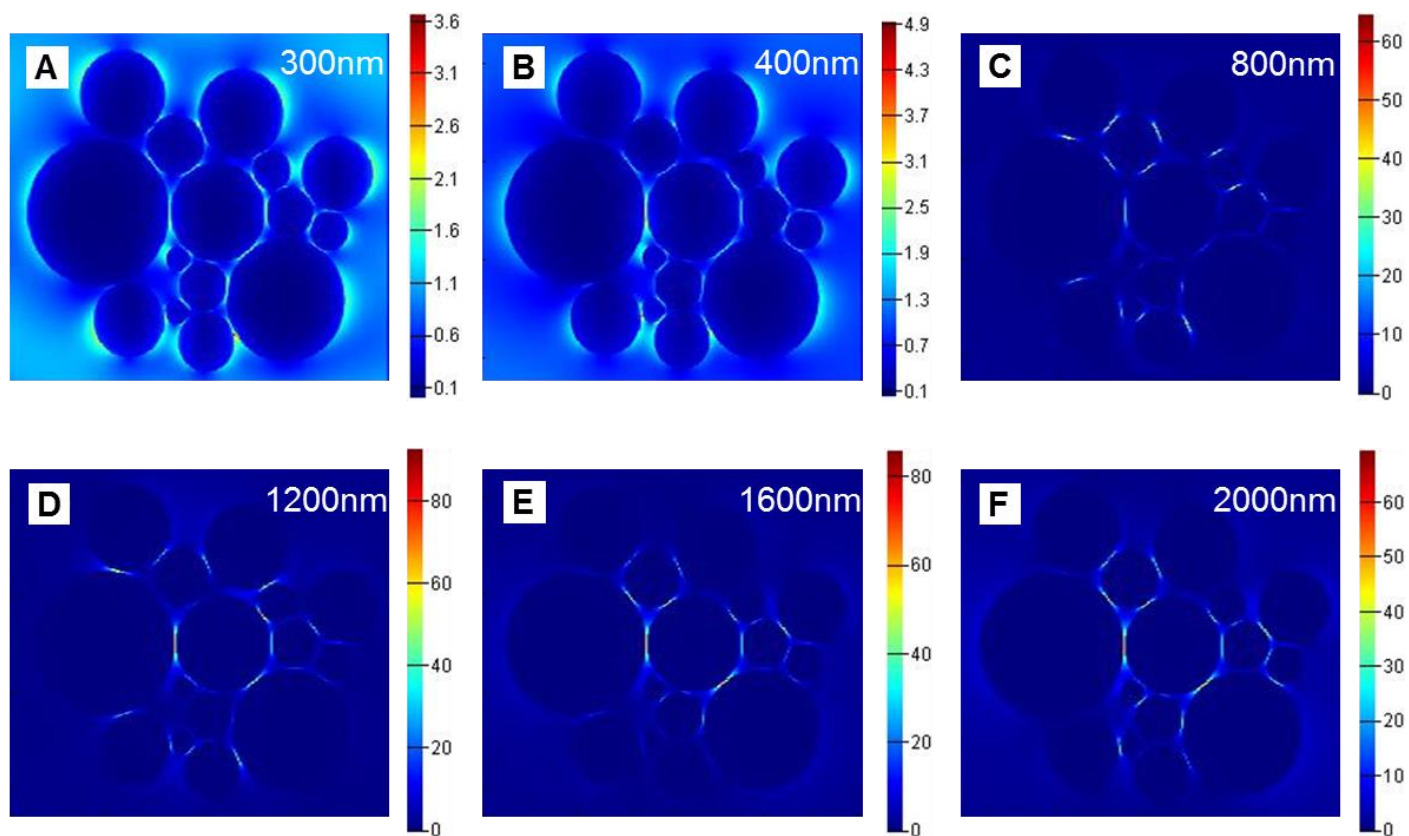

**Fig. S6.** The electric field enhancements of the Au nanoparticle oligomer. at a broadband range from 300 to 2000 nm.

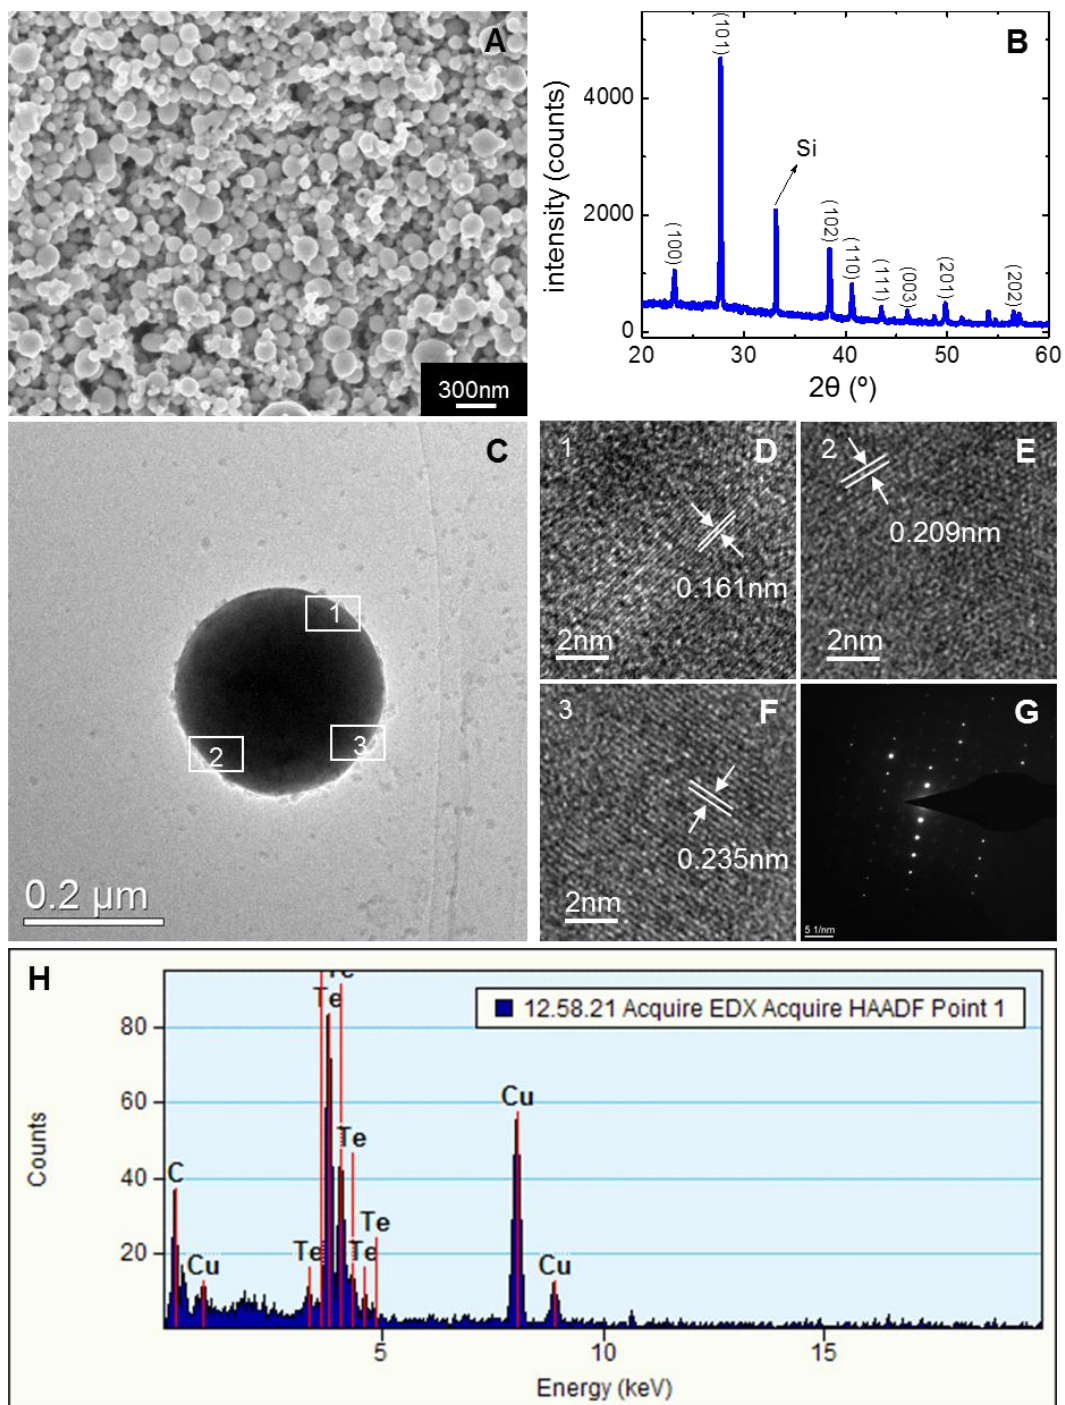

**Fig. S7.** Typical morphology and structure characterization of Te nanoparticles after working in steam generation for about 2 months. (A) SEM image of Te nanoparticles. (B) XRD pattern of Te nanoparticles deposited on a Si substrate. (C) TEM image of a Te nanoparticle (about 220 nm). (D), (E), (F) The corresponding HRTEM micrographs. (G) The corresponding SAED pattern. (H) The corresponding EDS pattern.



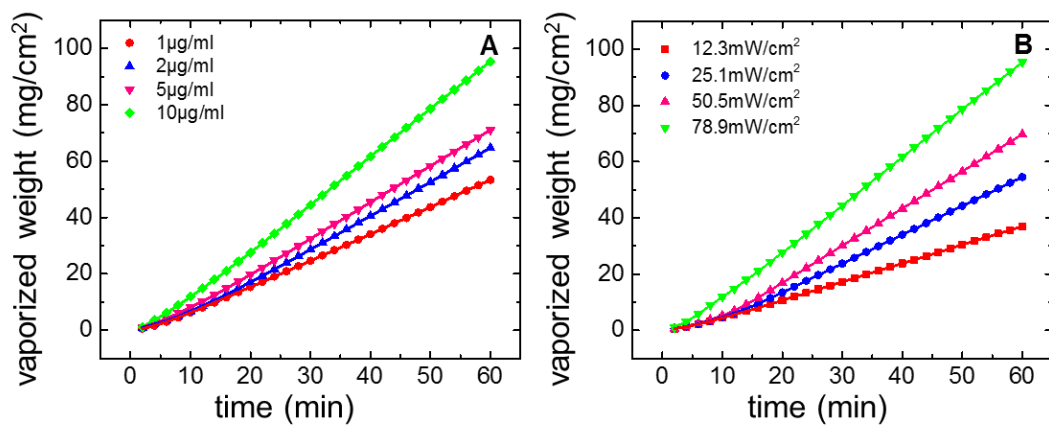

**Fig. S8. Water evaporation using Te nanoparticles that have been working in steam generation for about 2 months. (A)** Vaporized weight of Te nanoparticle solutions with different concentrations under the illumination of simulated sunlight at 78.9 mW/cm<sup>2</sup>. **(B)** Vaporized weight of Te nanoparticle solutions (10 µg/ml) under different illumination of simulated sunlight.

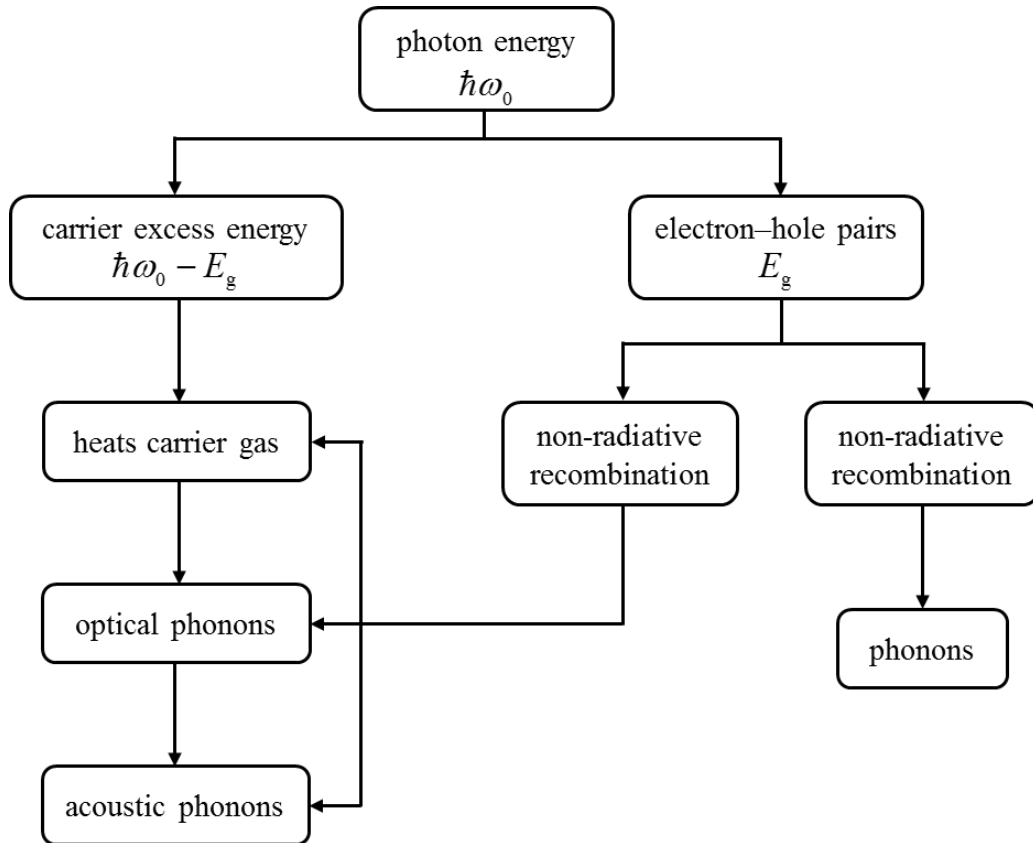

**Fig. S9. An intuitive diagram illustrating the flow of energy in a photoexcited semiconductor.**
